# Supplementary material for: How the cation 1-butyl-3-methylimidazolium impacts the interaction between the entrapped water and the reverse micelle interface created with an ionic liquid-like surfactant
Source: Royal Society of Chemistry journal article supplement (doi:10.1039/c5sm02421h), 2015-10-27
Supplement: c5sm02421h1.pdf [file c5sm02421h1.pdf]

## Electronic Supplementary Information

### **How the Cation 1-butyl-3-methylimidazolium Impacts on the Interaction between the Entrapped Water and the Reverse Micelles Interface Created with an Ionic Liquid-like Surfactant**

Cristian M. O. Lépori, Juana J. Silber, N. Mariano Correa, R. Darío Falcone\*

Departamento de Química. Universidad Nacional de Río Cuarto. Agencia Postal # 3.

C.P. X5804BYA Río Cuarto. ARGENTINA.

\* Dr. R. Darío Falcone. Corresponding-Author, E-mail: [rfalcone@exa.unrc.edu.ar](mailto:rfalcone@exa.unrc.edu.ar)

**Table S1.** Apparent diameter ( $d_{app}$ ) and polydispersity index (PDI) values of benzene/bmim-AOT/water RMs obtained at 25 °C varying  $W_0$ . [bmim-AOT] = 0.05 M.

| $W_0$ | $d_{app}$ (nm) | PDI  |
|-------|----------------|------|
| 3.0   | $2.6 \pm 0.1$  | 0.07 |
| 3.5   | $2.9 \pm 0.1$  | 0.07 |
| 4.0   | $3.2 \pm 0.1$  | 0.05 |
| 4.5   | $3.7 \pm 0.2$  | 0.02 |
| 5.0   | $3.9 \pm 0.2$  | 0.03 |

**Table S2.**  $^1\text{H}$  NMR chemical shifts (in ppm) for bmim-AOT and Na-AOT surfactants in  $\text{Cl}_3\text{CD}$ . [Surfactants] = 0.05 M.

| <b>H</b>                               | <b>Chemical shift (ppm)</b> |               |
|----------------------------------------|-----------------------------|---------------|
|                                        | <b>bmim-AOT</b>             | <b>Na-AOT</b> |
| <b>H<sub>2</sub></b>                   | 9.52                        | -             |
| <b>H<sub>4</sub> and H<sub>5</sub></b> | 7.43 and 7.54               | -             |
| <b>H1</b>                              | 4.25                        | 4.29          |
| <b>H1'</b>                             | 3.27 – 3.22                 | 3.17 – 3.15   |
| <b>H3'</b>                             | 4.16                        | 3.95          |
| <b>H3</b>                              | 4.18                        | 4.08          |

**Table S3.**  $dn/dc$ , Micellar molecular weight ( $M_w$ ) and aggregation numbers ( $N_{agg}$ ) values of benzene/bmim-AOT/water and benzene/Na-AOT/water RMs obtained varying the surfactant concentration at  $W_0 = 5$ .

| <b>Micellar system</b> | $M_s^a$ (g mol <sup>-1</sup> ) | $dn/dc$ (mL g <sup>-1</sup> ) | $M_w$ (g mol <sup>-1</sup> ) | $N_{agg}^b$ |
|------------------------|--------------------------------|-------------------------------|------------------------------|-------------|
| benzene/Na-AOT/water   | 444.6                          | $0.0661 \pm 0.0002$           | $8850 \pm 392$               | $17 \pm 1$  |
| benzene/bmim-AOT/water | 560.78                         | $0.0608 \pm 0.0001$           | $15198 \pm 1174$             | $23 \pm 2$  |

<sup>a</sup>  $M_s$  = molecular weight of surfactant monomer. <sup>b</sup>  $N_{agg} = M_w / (M_s + W_0 * M_{H_2O})$ .  $M_{H_2O}$  = water molecular weight.  $M_w$  was determined using the equation  $KC/R_\theta = 1/M_w + 2 A_2 C$ , where  $C$  is the surfactant concentration,  $R_\theta$  is the Rayleigh ratio,  $A_2$  is the 2<sup>nd</sup> virial coefficient and  $K$  is an optical constant ( $K = 4\pi^2 n_0^2 (dn/dc)^2 / N_A \lambda^4$  where  $n_0$  is the solvent refractive index,  $\lambda$  is the wavelength of the incident light (488 nm), and  $N_A$  is the Avogadro number).

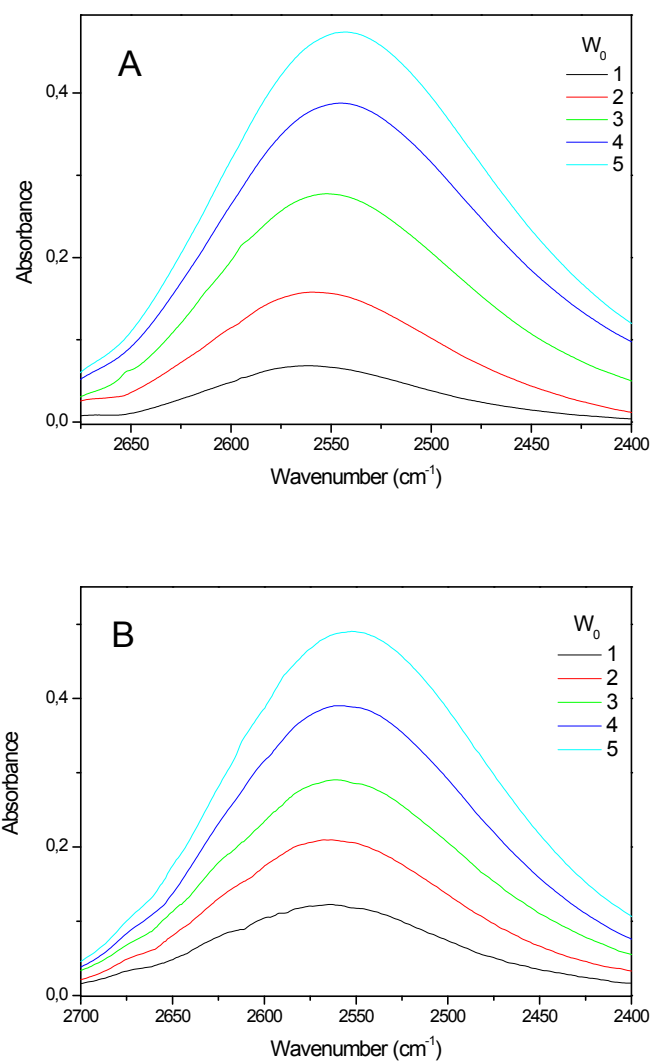

**Figure S1.** FT-IR spectra of benzene/surfactant/HDO RMs at different  $W_0$  values in the region of 2640-2420 cm<sup>-1</sup>. A) bmim-AOT and B) Na-AOT. [surfactant] = 0.2 M.

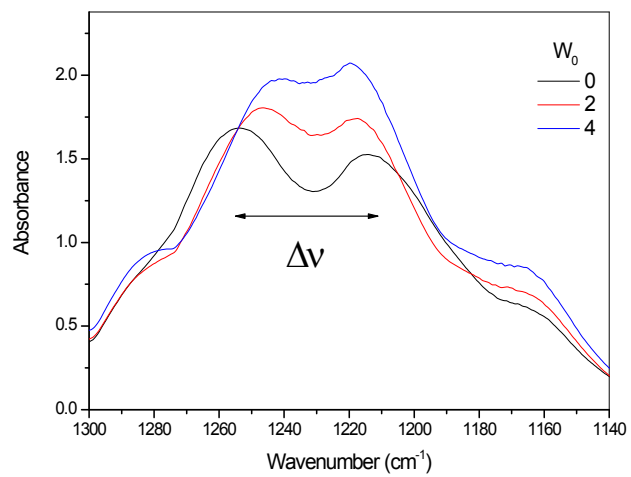

**Figure S2.** FT-IR spectra of chlorobenzene/Na-AOT/water RMs at different  $W_0$  values in the region of 1300-1140 cm<sup>-1</sup> ( $\nu_{\text{asym}}\text{SO}_3$ ). The chlorobenzene bands have been subtracted. [Na-AOT] = 0.05 M.

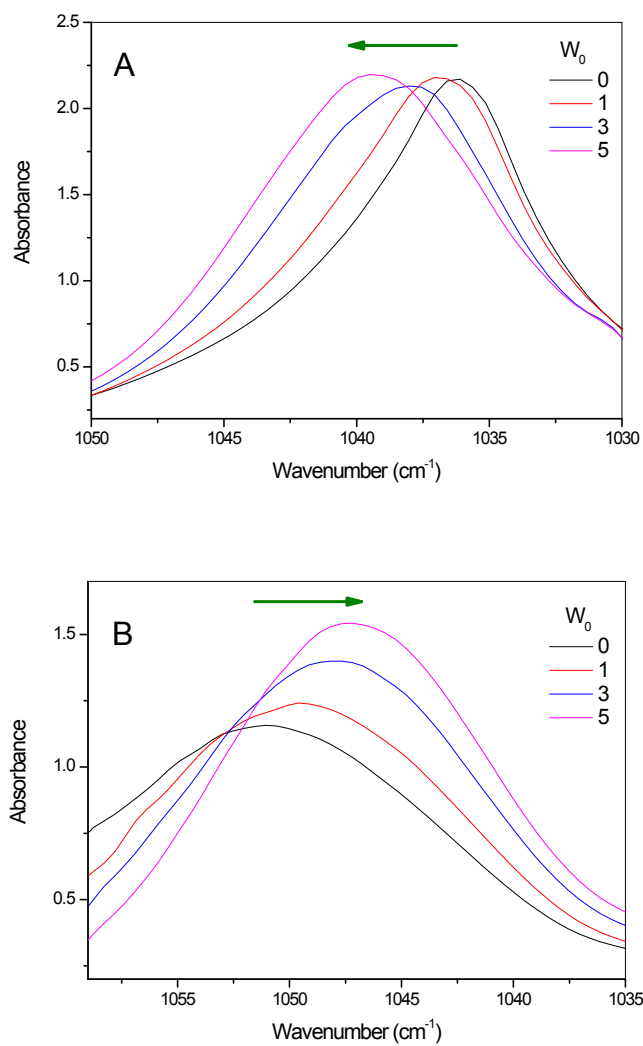

**Figure S3.** FT-IR spectra of chlorobenzene/surfactant/water RMs at different  $W_0$  values in the region of symmetrical sulfonate mode. (A) bmim-AOT and (B) Na-AOT. The chlorobenzene bands have been subtracted. [Surfactant] = 0.05 M.

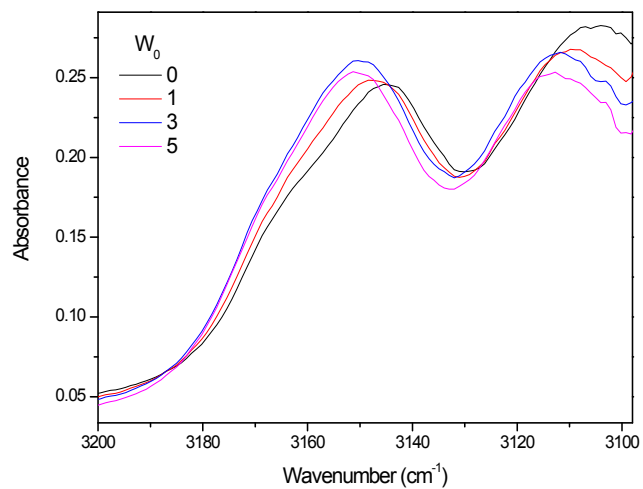

**Figure S4.** FT-IR spectra of bmim<sup>+</sup> in chlorobenzene/bmim-AOT RMs at different  $W_0$  values, in the region of 3200-3100 cm<sup>-1</sup>. [bmim-AOT] = 0.05 M. The chlorobenzene bands have been subtracted.



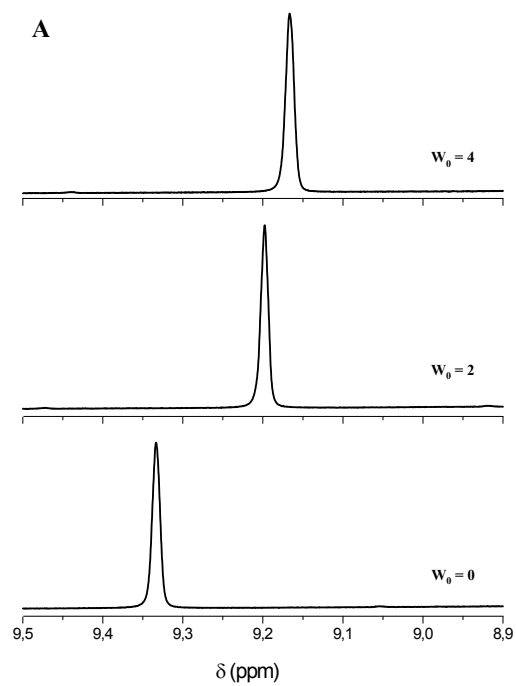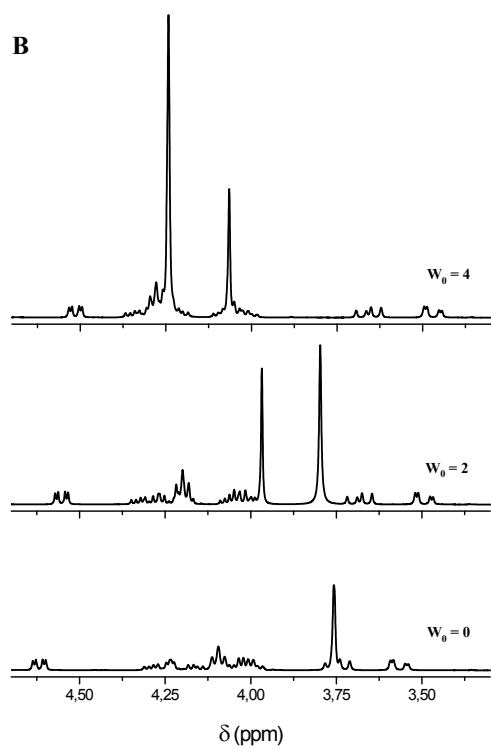

**Figure S5.** Typical  $^1\text{H}$  NMR spectra for benzene/bmim-AOT RMs at different  $W_0$  in the region of 9.5-8.9 ppm (A) and 4.7-3.3 ppm (B).  $[\text{bmim-AOT}] = 0.05 \text{ M}$ .

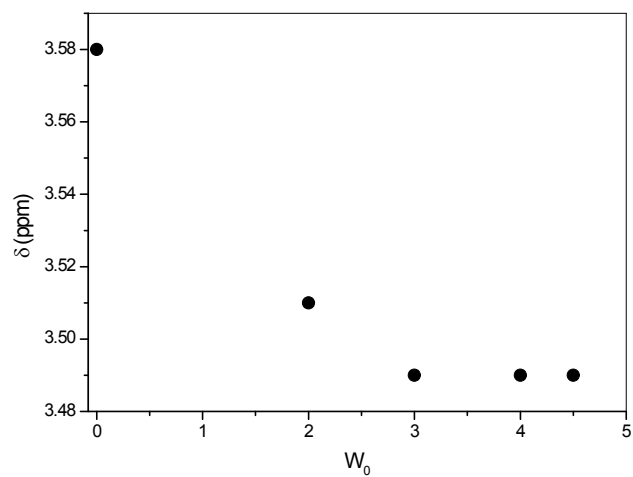

**Figure S6.**  $^1\text{H}$  NMR chemical shifts of AOT  $\text{H1}'$  in benzene/bmim-AOT/water RMs at different  $W_0$ .  $[\text{bmim-AOT}] = 0.05 \text{ M}$ .

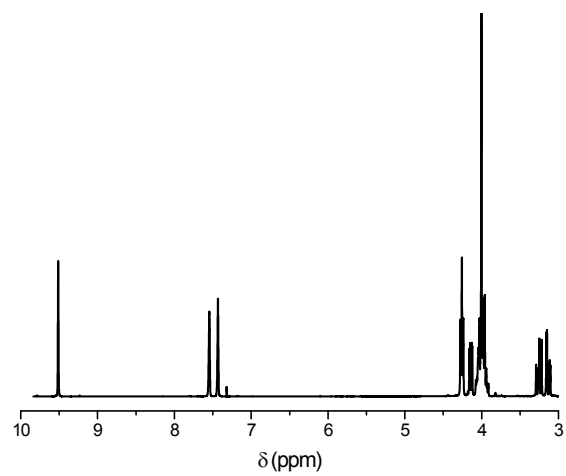

**Figure S7.**  $^1\text{H}$  NMR spectrum of bmim-AOT in  $\text{Cl}_3\text{CD}$ .  $[\text{bmim-AOT}] = 0.05 \text{ M}$ .

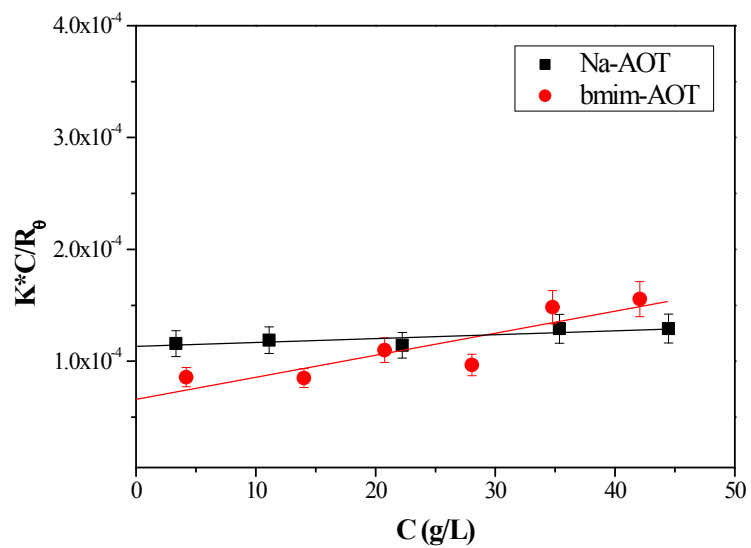

**Figure S8.** Debye plots of  $K^*C/R_\theta$  in benzene/surfactant/water RMs as a function of the surfactant concentration ( $C$ ) obtained by SLS at  $90^\circ$  scattering angle.
